# Supplementary material for: MicroRNA-18a inhibits hypoxia-inducible factor 1α activity and lung metastasis in basal breast cancers
Source: PubMed Central journal article supplement (PMC4405876; doi:10.1186/bcr3693), 2014-07-28

**A**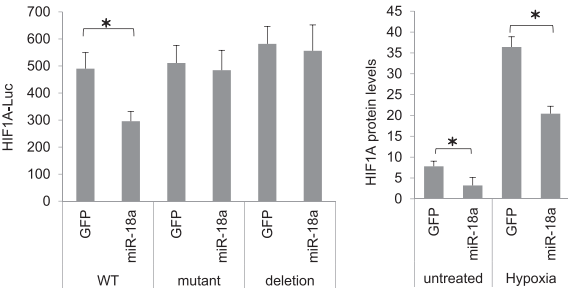**C**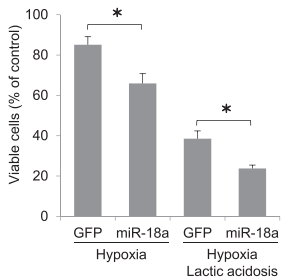**B**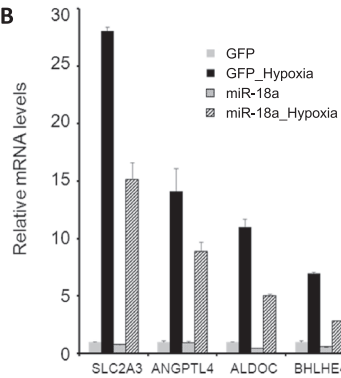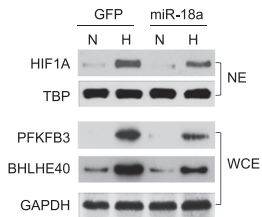

Supplement: 13058_2013_3438_MOESM4_ESM.pdf [file 13058_2013_3438_MOESM4_ESM.pdf]
