# Supplementary material for: MicroRNA-18a inhibits hypoxia-inducible factor 1α activity and lung metastasis in basal breast cancers
Source: PubMed Central journal article supplement (PMC4405876; doi:10.1186/bcr3693), 2014-07-28
Supplement: 13058_2013_3438_MOESM9_ESM.pdf [file 13058_2013_3438_MOESM9_ESM.pdf]

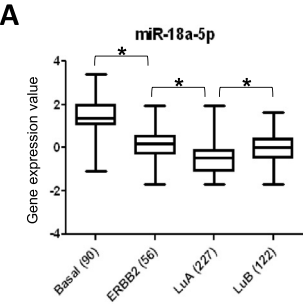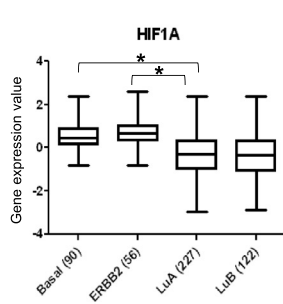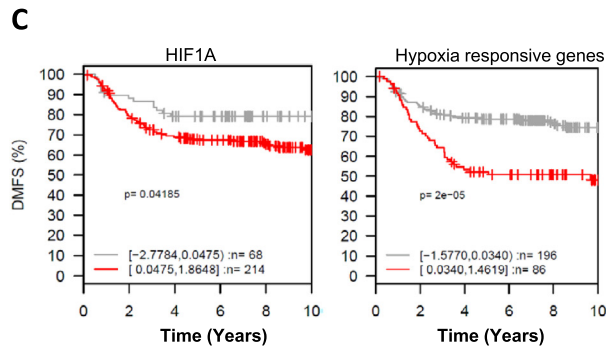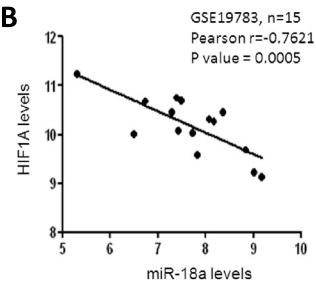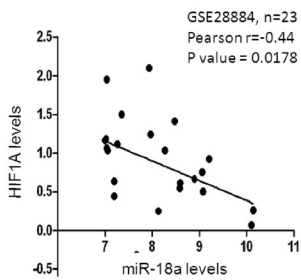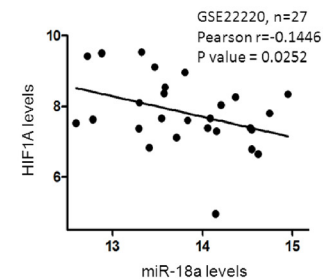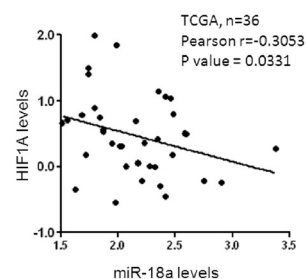

### Hypoxia responsive genes negatively correlated with miR-18a in basal-like breast cancer tumors

| Gene     | Pearson r | P value  | Data set | cases |
|----------|-----------|----------|----------|-------|
| ADM      | -0.310    | 2.90E-03 | GSE28884 | n=23  |
| AKAP12   | -0.519    | 2.80E-03 | GSE22220 | n=27  |
| ANG*     | -0.306    | 3.20E-03 | GSE28884 | n=23  |
| ANGPTL4  | -0.204    | 3.67E-02 | GSE28884 | n=23  |
| COL5A1*  | -0.460    | 3.00E-03 | TCGA     | n=36  |
| CYR61*   | -0.577    | 1.21E-02 | GSE19783 | n=15  |
| DBP      | -0.302    | 3.60E-03 | GSE28884 | n=23  |
| DHRS3    | -0.236    | 1.86E-02 | GSE28884 | n=23  |
| EFEMP2   | -0.327    | 1.80E-03 | GSE28884 | n=23  |
| EGR1*    | -0.675    | 2.90E-03 | GSE19783 | n=15  |
| FILIP1L* | -0.657    | 3.90E-03 | GSE19783 | n=15  |
| FKBP14*  | -0.400    | 8.00E-03 | TCGA     | n=36  |
| GJA1     | -0.281    | 6.40E-03 | GSE28884 | n=23  |
| HTRA1    | -0.706    | 1.60E-03 | GSE19783 | n=15  |
| LOXL1*   | -0.501    | 2.85E-02 | GSE19783 | n=15  |
| PCOLCE*  | -0.420    | 6.00E-03 | TCGA     | n=36  |
| PDGFRL*  | -0.390    | 1.00E-02 | TCGA     | n=36  |
| PHLDA3*  | -0.554    | 1.60E-02 | GSE19783 | n=15  |
| RAI14*   | -0.473    | 3.77E-02 | GSE19783 | n=15  |
| SDC2     | -0.558    | 1.54E-02 | GSE19783 | n=15  |
| SERPINB6 | -0.220    | 2.67E-02 | GSE28884 | n=23  |
| SLC2A3*  | -0.545    | 1.78E-02 | GSE19783 | n=15  |

All listed genes were found to be negatively correlated with miR-18a expression ( $P < 0.05$ ) in more than two datasets. The dataset with lowest p value for each gene is presented.

\*Genes downregulated by miR-18a in LM cells under hypoxia based on RT-qPCR analysis
